# Supplementary material for: Preoperative anemia in colorectal cancer: relationships with tumor characteristics, systemic inflammation, and survival
Source: PubMed Central journal article supplement (PMC5773501; doi:10.1038/s41598-018-19572-y), 2018-01-18
Supplement: 41598_2018_19572_MOESM1_ESM.pdf [file 41598_2018_19572_MOESM1_ESM.pdf]

## Supplementary online material

### **Preoperative anemia in colorectal cancer: relationships with tumor characteristics, systemic inflammation, and survival**

Juha P. Väyrynen<sup>1</sup>, Anne Tuomisto<sup>1</sup>, Sara A. Väyrynen<sup>1</sup>, Kai Klintrup<sup>2</sup>, Toni Karhu<sup>3</sup>, Jyrki Mäkelä<sup>2</sup>, Karl-Heinz Herzig<sup>3,4</sup>, Tuomo J. Karttunen<sup>1</sup>, Markus J. Mäkinen<sup>1</sup>

<sup>1</sup> Cancer and Translational Medicine Research Unit, University of Oulu, POB 5000, Oulu 90014, Finland; Finland; Department of Pathology, Oulu University Hospital and Medical Research Center Oulu, Oulu, POB 21, Oulu 90029, Finland

<sup>2</sup> Research Unit of Surgery, Anesthesia and Intensive Care, University of Oulu, POB 5000, Oulu 90014, Finland; Department of Surgery, Oulu University Hospital and Medical Research Center Oulu, POB 21, Oulu 90029, Finland

<sup>3</sup> Research Unit of Biomedicine and Biocenter of Oulu, University of Oulu, POB 5000, Oulu 90014, Finland; Oulu University Hospital and Medical Research Center Oulu, POB 21, Oulu 90029, Finland

<sup>4</sup> Department of Gastroenterology and Metabolism, Poznan University of Medical Sciences, ul. Szpitalna 27/33, 60-572, Poznan, Poland

## Supplementary online material

**Table S1.** Relationships between different categories of anemia and clinicopathological characteristics in Cohort 1.

| Variable                                              | No anemia (n=91) | Microcytic anemia (n=14) | Normocytic anemia (n=42) | P value |
|-------------------------------------------------------|------------------|--------------------------|--------------------------|---------|
| <b>Age</b>                                            |                  |                          |                          |         |
| <65                                                   | 38 (64.4%)       | 4 (6.8%)                 | 17 (28.8%)               | 0.668   |
| ≥65                                                   | 53 (60.2%)       | 10 (11.4%)               | 25 (28.4%)               |         |
| <b>Sex</b>                                            |                  |                          |                          |         |
| Male                                                  | 50 (63.3%)       | 8 (10.1%)                | 21 (26.6%)               | 0.848   |
| Female                                                | 41 (60.3%)       | 6 (8.8%)                 | 21 (30.9%)               |         |
| <b>Location of tumor</b>                              |                  |                          |                          |         |
| Proximal colon                                        | 18 (37.5%)       | 11 (22.9%)               | 19 (39.6%)               | <0.001  |
| Distal colon                                          | 15 (53.6%)       | 2 (7.1%)                 | 11 (39.3%)               |         |
| Rectum                                                | 58 (81.7%)       | 1 (1.4%)                 | 12 (16.9%)               |         |
| <b>Preoperative radiotherapy or chemoradiotherapy</b> |                  |                          |                          |         |
| No                                                    | 64 (55.2%)       | 14 (12.1%)               | 38 (32.8%)               | 0.004   |
| Yes                                                   | 27 (87.1%)       | 0 (0%)                   | 4 (12.9%)                |         |
| <b>WHO grade</b>                                      |                  |                          |                          |         |
| Grade 1                                               | 14 (70.0%)       | 2 (10.0%)                | 4 (20.0%)                | 0.871   |
| Grade 2                                               | 67 (62.0%)       | 10 (9.3%)                | 31 (28.7%)               |         |
| Grade 3                                               | 10 (55.6%)       | 2 (11.1%)                | 6 (33.3%)                |         |
| <b>TNM Stage</b>                                      |                  |                          |                          |         |
| Stage I                                               | 22 (81.5%)       | 1 (3.7%)                 | 4 (14.8%)                | 0.038   |
| Stage II                                              | 26 (48.1%)       | 6 (11.1%)                | 22 (40.7%)               |         |
| Stage III                                             | 31 (72.1%)       | 5 (11.6%)                | 7 (16.3%)                |         |
| Stage IV                                              | 12 (54.5%)       | 2 (9.1%)                 | 8 (36.4%)                |         |
| <b>Primary tumor</b>                                  |                  |                          |                          |         |
| T1                                                    | 5 (100.0%)       | 0 (0%)                   | 0 (0%)                   | 0.031   |
| T2                                                    | 23 (79.3%)       | 1 (3.4%)                 | 5 (17.2%)                |         |
| T3                                                    | 60 (59.4%)       | 12 (11.9%)               | 29 (28.7%)               |         |
| T4                                                    | 3 (27.3%)        | 1 (9.1%)                 | 7 (63.6%)                |         |
| <b>Lymph node metastasis</b>                          |                  |                          |                          |         |
| N0                                                    | 49 (57.6%)       | 8 (9.4%)                 | 28 (32.9%)               | 0.131   |
| N1                                                    | 28 (80.0%)       | 2 (5.7%)                 | 5 (14.3%)                |         |
| N2                                                    | 14 (56.0%)       | 4 (16.0%)                | 7 (28.0%)                |         |
| <b>Distant Metastasis</b>                             |                  |                          |                          |         |
| M0                                                    | 79 (63.2%)       | 12 (9.6%)                | 34 (27.2%)               | 0.783   |
| M1                                                    | 12 (54.5%)       | 2 (9.1%)                 | 8 (36.4%)                |         |
| <b>Infiltrative growth pattern</b>                    |                  |                          |                          |         |
| No                                                    | 63 (61.2%)       | 9 (8.7%)                 | 31 (30.0%)               | 0.645   |
| Yes                                                   | 28 (65.1%)       | 5 (11.6%)                | 10 (23.3%)               |         |
| <b>Lymphatic invasion</b>                             |                  |                          |                          |         |
| No                                                    | 50 (60.2%)       | 7 (8.4%)                 | 26 (31.3%)               | 0.756   |
| Yes                                                   | 39 (65.0%)       | 6 (10.0%)                | 15 (25.0%)               |         |

|                                                 |            |            |            |       |
|-------------------------------------------------|------------|------------|------------|-------|
| <b>Blood vessel invasion</b>                    |            |            |            |       |
| No                                              | 70 (60.3%) | 12 (10.3%) | 34 (29.3%) | 0.490 |
| Yes                                             | 19 (70.4%) | 1 (3.7%)   | 7 (25.9%)  |       |
| <b>Mismatch repair (MMR) enzyme status</b>      |            |            |            |       |
| MMR Proficient                                  | 88 (65.2%) | 12 (8.9%)  | 35 (25.9%) | 0.034 |
| MMR Deficient                                   | 3 (27.3%)  | 2 (18.2%)  | 6 (54.5%)  |       |
| <b>BRAF VE1 immunohistochemistry</b>            |            |            |            |       |
| Negative                                        | 85 (64.4%) | 11 (8.3%)  | 36 (27.3%) | 0.063 |
| Positive                                        | 5 (35.7%)  | 3 (21.4%)  | 6 (42.9%)  |       |
| <b>Modified Glasgow Prognostic Score (mGPS)</b> |            |            |            |       |
| 0                                               | 79 (67.5%) | 12 (10.3%) | 26 (22.2%) | 0.002 |
| 1                                               | 12 (48.0%) | 2 (8.0%)   | 11 (44.0%) |       |
| 2                                               | 0 (0%)     | 0 (0%)     | 5 (100.0%) |       |

Due to the small number of macrocytic anemia cases (Cohort 1: n=1, Cohort 2: n=1), macrocytic anemia category was not included in the analysis.

**Table S2.** Relationships between different classes of anemia and clinicopathological characteristics in Cohort 2.

| <b>Variable</b>                                       | <b>No anemia (n=111)</b> | <b>Microcytic anemia (n=29)</b> | <b>Normocytic anemia (n=67)</b> | <b>P value</b> |
|-------------------------------------------------------|--------------------------|---------------------------------|---------------------------------|----------------|
| <b>Age</b>                                            |                          |                                 |                                 |                |
| <65                                                   | 44 (62.0%)               | 10 (14.1%)                      | 17 (23.9%)                      | 0.150          |
| ≥65                                                   | 67 (49.3%)               | 19 (14.0%)                      | 50 (36.8%)                      |                |
| <b>Sex</b>                                            |                          |                                 |                                 |                |
| Male                                                  | 57 (52.3%)               | 19 (17.4%)                      | 33 (30.3%)                      | 0.334          |
| Female                                                | 54 (55.1%)               | 10 (10.2%)                      | 34 (34.7%)                      |                |
| <b>Location of tumor</b>                              |                          |                                 |                                 |                |
| Proximal colon                                        | 21 (28.0%)               | 17 (22.7%)                      | 37 (49.3%)                      | <0.001         |
| Distal colon                                          | 25 (55.6%)               | 8 (17.8%)                       | 12 (26.7%)                      |                |
| Rectum                                                | 65 (74.7%)               | 4 (4.6%)                        | 18 (20.7%)                      |                |
| <b>Preoperative radiotherapy or chemoradiotherapy</b> |                          |                                 |                                 |                |
| No                                                    | 83 (49.1%)               | 27 (16.0%)                      | 59 (34.9%)                      | 0.017          |
| Yes                                                   | 28 (73.7%)               | 2 (5.3%)                        | 8 (21.1%)                       |                |
| <b>WHO grade</b>                                      |                          |                                 |                                 |                |
| Grade 1                                               | 28 (49.1%)               | 12 (21.1%)                      | 17 (29.8%)                      | 0.132          |
| Grade 2                                               | 72 (59.5%)               | 13 (10.7%)                      | 36 (29.8%)                      |                |
| Grade 3                                               | 11 (39.3%)               | 4 (14.3%)                       | 13 (46.4%)                      |                |
| <b>TNM Stage</b>                                      |                          |                                 |                                 |                |
| Stage I                                               | 31 (57.4%)               | 4 (7.4%)                        | 19 (35.2%)                      | 0.017          |
| Stage II                                              | 24 (40.7%)               | 16 (27.1%)                      | 19 (32.2%)                      |                |
| Stage III                                             | 45 (63.4%)               | 7 (9.9%)                        | 19 (26.8%)                      |                |
| Stage IV                                              | 11 (47.8%)               | 2 (8.7%)                        | 10 (43.5%)                      |                |
| <b>Primary tumor</b>                                  |                          |                                 |                                 |                |
| T1                                                    | 7 (70.0%)                | 0 (0%)                          | 3 (30.0%)                       | 0.204          |
| T2                                                    | 36 (60.0%)               | 4 (6.7%)                        | 20 (33.3%)                      |                |
| T3                                                    | 60 (51.7%)               | 21 (18.1%)                      | 35 (30.2%)                      |                |
| T4                                                    | 8 (38.1%)                | 4 (19.0%)                       | 9 (42.9%)                       |                |
| <b>Lymph node metastasis</b>                          |                          |                                 |                                 |                |
| N0                                                    | 56 (49.1%)               | 20 (17.5%)                      | 38 (33.3%)                      | 0.461          |
| N1                                                    | 37 (60.7%)               | 5 (8.2%)                        | 19 (31.1%)                      |                |
| N2                                                    | 18 (56.3%)               | 4 (12.5%)                       | 10 (31.3%)                      |                |
| <b>Distant Metastasis</b>                             |                          |                                 |                                 |                |
| M0                                                    | 100 (54.3%)              | 27 (14.7%)                      | 57 (31.0%)                      | 0.417          |
| M1                                                    | 11 (47.8%)               | 2 (8.7%)                        | 10 (43.5%)                      |                |
| <b>Infiltrative growth pattern</b>                    |                          |                                 |                                 |                |
| No                                                    | 95 (54.9%)               | 23 (13.3%)                      | 55 (31.8%)                      | 0.681          |
| Yes                                                   | 16 (47.1%)               | 6 (17.6%)                       | 12 (35.3%)                      |                |
| <b>Lymphatic invasion</b>                             |                          |                                 |                                 |                |
| No                                                    | 57 (52.8%)               | 17 (15.7%)                      | 34 (31.5%)                      | 0.775          |
| Yes                                                   | 54 (54.5%)               | 12 (12.1%)                      | 33 (33.3%)                      |                |
| <b>Blood vessel invasion</b>                          |                          |                                 |                                 |                |
| No                                                    | 97 (55.4%)               | 24 (13.7%)                      | 54 (30.9%)                      | 0.472          |

|                                                 |             |            |            |       |
|-------------------------------------------------|-------------|------------|------------|-------|
| Yes                                             | 14 (43.8%)  | 5 (15.6%)  | 13 (40.6%) |       |
| <b>Mismatch repair (MMR) enzyme status</b>      |             |            |            |       |
| MMR Proficient                                  | 103 (57.9%) | 22 (12.4%) | 53 (29.8%) | 0.008 |
| MMR Deficient                                   | 8 (27.6%)   | 7 (24.1%)  | 14 (48.3%) |       |
| <b>BRAF VE1 immunohistochemistry</b>            |             |            |            |       |
| Negative                                        | 103 (54.8%) | 27 (14.4%) | 58 (30.9%) | 0.368 |
| Positive                                        | 8 (42.1%)   | 2 (10.5%)  | 9 (47.4%)  |       |
| <b>Modified Glasgow Prognostic Score (mGPS)</b> |             |            |            |       |
| 0                                               | 89 (59.3%)  | 18 (12.0%) | 43 (28.7%) | 0.006 |
| 1                                               | 13 (34.2%)  | 7 (18.4%)  | 18 (47.4%) |       |
| 2                                               | 0 (0%)      | 0 (0%)     | 3 (100.0%) |       |

Due to the small number of macrocytic anemia cases (Cohort 1: n=1, Cohort 2: n=1), macrocytic anemia category was not included in the analysis.

**Table S3.** Relationships between blood hemoglobin (Hb) levels (g/L) and clinicopathological characteristics in two colorectal cancer cohorts.

| Variable<br>(n, Cohort 1; n, Cohort 2)                                          | Cohort 1 (n=148)    |         | Cohort 2 (n=208)    |         |
|---------------------------------------------------------------------------------|---------------------|---------|---------------------|---------|
|                                                                                 | Blood Hb, Mean (SD) | P value | Blood Hb, Mean (SD) | P value |
| <b>All Patients</b>                                                             | 126.7 (17.3)        |         | 126.5 (17.4)        |         |
| <b>Age</b>                                                                      |                     |         |                     |         |
| <65 (n=59; n=71)                                                                | 127.9 (17.1)        | 0.496   | 130.8 (17.8)        | 0.011   |
| ≥65 (n=89; n=137)                                                               | 125.9 (17.5)        |         | 124.3 (16.9)        |         |
| <b>Sex</b>                                                                      |                     |         |                     |         |
| Male (n=80; n=110)                                                              | 130.6 (19.0)        | 0.002   | 130.9 (18.0)        | <0.001  |
| Female (n=68; n=98)                                                             | 122.0 (13.7)        |         | 121.6 (15.4)        |         |
| <b>Location of tumor</b>                                                        |                     |         |                     |         |
| Proximal colon (n=48; n=75)                                                     | 117.3 (17.5)        | <0.001  | 115.9 (14.3)        | <0.001  |
| Distal colon (n=28; n=45)                                                       | 123.1 (14.4)        |         | 126.4 (16.8)        |         |
| Rectum (n=72; n=88)                                                             | 134.4 (14.6)        |         | 135.6 (15.0)        |         |
| <b>Preoperative radiotherapy or chemoradiotherapy in rectal cancer patients</b> |                     |         |                     |         |
| No (n=40; n=51)                                                                 | 133.8 (16.2)        | 0.725   | 136.0 (15.9)        | 0.787   |
| Yes (n=32; n=37)                                                                | 135.0 (12.6)        |         | 135.1 (14.0)        |         |
| <b>WHO grade</b>                                                                |                     |         |                     |         |
| Grade 1 (n=21; n=58)                                                            | 131.1 (17.2)        | 0.169   | 124.6 (17.5)        | 0.035   |
| Grade 2 (n=108; n=121)                                                          | 127.0 (17.4)        |         | 128.9 (17.4)        |         |
| Grade 3 (n=18; n=28)                                                            | 120.7 (15.2)        |         | 120.2 (16.3)        |         |
| <b>TNM Stage</b>                                                                |                     |         |                     |         |
| Stage I (n=27; n=54)                                                            | 139.0 (14.5)        | <0.001  | 129.1 (17.9)        | 0.347   |
| Stage II (n=54; n=59)                                                           | 122.3 (16.6)        |         | 123.5 (17.7)        |         |
| Stage III (n=44; n=71)                                                          | 128.3 (18.0)        |         | 127.5 (16.9)        |         |
| Stage IV (n=22; n=24)                                                           | 119.2 (11.4)        |         | 125.2 (17.2)        |         |
| <b>Primary tumor</b>                                                            |                     |         |                     |         |
| T1 (n=5; n=11)                                                                  | 149.8 (12.8)        | <0.001  | 130.3 (13.3)        | 0.191   |
| T2 (n=29; n=60)                                                                 | 135.7 (13.1)        |         | 129.5 (17.8)        |         |
| T3 (n=102; n=116)                                                               | 124.4 (16.8)        |         | 125.7 (17.1)        |         |
| T4 (n=11; n=21)                                                                 | 115.6 (16.2)        |         | 120.8 (19.4)        |         |
| <b>Lymph node metastasis</b>                                                    |                     |         |                     |         |
| N0 (n=85; n=115)                                                                | 127.3 (17.6)        | 0.131   | 126.1 (17.8)        | 0.610   |
| N1 (n=36; n=61)                                                                 | 130.2 (15.2)        |         | 128.2 (17.7)        |         |
| N2 (n=25; n=32)                                                                 | 121.2 (17.9)        |         | 124.7 (15.7)        |         |
| <b>Distant Metastasis</b>                                                       |                     |         |                     |         |
| M0 (n=126; n=184)                                                               | 127.8 (17.8)        | 0.004   | 126.7 (17.5)        | 0.686   |
| M1 (n=22; n=24)                                                                 | 120.0 (11.7)        |         | 125.2 (17.2)        |         |
| <b>Infiltrative growth pattern</b>                                              |                     |         |                     |         |
| No (n=104; n=174)                                                               | 126.7 (17.3)        | 0.870   | 127.3 (17.3)        | 0.114   |
| Yes (n=43; n=34)                                                                | 127.2 (17.3)        |         | 122.5 (17.9)        |         |
| <b>Lymphatic invasion</b>                                                       |                     |         |                     |         |
| No (n=83; n=109)                                                                | 126.9 (17.2)        | 0.964   | 127.1 (17.6)        | 0.601   |
| Yes (n=61; n=99)                                                                | 127.1 (17.6)        |         | 125.9 (17.4)        |         |

|                                                 |              |        |              |        |
|-------------------------------------------------|--------------|--------|--------------|--------|
| <b>Blood vessel invasion</b>                    |              |        |              |        |
| No (n=117; n=176)                               | 126.6 (17.5) | 0.574  | 127.2 (17.3) | 0.199  |
| Yes (n=27; n=32)                                | 128.7 (16.9) |        | 122.9 (17.8) |        |
| <b>Mismatch repair (MMR) enzyme status</b>      |              |        |              |        |
| MMR Proficient (n=136; n=179)                   | 127.3 (16.8) | 0.239  | 128.3 (17.2) | <0.001 |
| MMR Deficient (n=11; n=29)                      | 120.9 (22.3) |        | 115.8 (15.0) |        |
| <b>BRAF VE1 immunohistochemistry</b>            |              |        |              |        |
| Negative (n=133; n=189)                         | 127.5 (17.2) | 0.058  | 127.2 (17.7) | 0.082  |
| Positive (n=14; n=19)                           | 118.3 (17.0) |        | 119.9 (13.3) |        |
| <b>Modified Glasgow Prognostic Score (mGPS)</b> |              |        |              |        |
| 0 (n=118; n=151)                                | 129.3 (17.4) | <0.001 | 128.3 (17.1) | 0.006  |
| 1 (n=25; n=38)                                  | 118.2 (12.6) |        | 121.2 (17.6) |        |
| 2 (n=5; n=3)                                    | 106.8 (3.1)  |        | 103.3 (9.2)  |        |
| <b>Mean corpuscular volume (MCV)</b>            |              |        |              |        |
| <80 (n=16; n=29)                                | 103.7 (10.5) | <0.001 | 109.3 (11.0) | <0.001 |
| 80–100 (n=130; n=176)                           | 129.6 (15.9) |        | 129.2 (16.7) |        |
| >100 (n=2; n=3)                                 | 125.0 (1.41) |        | 134.0 (18.5) |        |

---

**Table S4.** Relationships between erythrocyte mean corpuscular volume (MCV) levels (fL) and clinicopathological characteristics in two colorectal cancer cohorts

| Variable<br>(n, Cohort 1; n, Cohort 2)                                          | Cohort 1       |         | Cohort 2       |         |
|---------------------------------------------------------------------------------|----------------|---------|----------------|---------|
|                                                                                 | MCV, Mean (SD) | P value | MCV, Mean (SD) | P value |
| <b>All Patients</b>                                                             | 88.6 (7.0)     |         | 86.6 (6.3)     |         |
| <b>Age</b>                                                                      |                |         |                |         |
| <65 (n=59; n=71)                                                                | 88.7 (7.3)     | 0.937   | 86.4 (6.8)     | 0.643   |
| ≥65 (n=89; n=137)                                                               | 88.6 (6.9)     |         | 86.8 (6.1)     |         |
| <b>Sex</b>                                                                      |                |         |                |         |
| Male (n=80; n=110)                                                              | 89.8 (7.3)     | 0.028   | 86.8 (6.5)     | 0.636   |
| Female (n=68; n=98)                                                             | 87.3 (6.4)     |         | 86.4 (6.1)     |         |
| <b>Location of tumor</b>                                                        |                |         |                |         |
| Proximal colon (n=48; n=75)                                                     | 85.0 (8.2)     | <0.001  | 84.1 (6.1)     | <0.001  |
| Distal colon (n=28; n=45)                                                       | 88.5 (6.0)     |         | 85.8 (6.4)     |         |
| Rectum (n=72; n=88)                                                             | 91.1 (5.3)     |         | 89.2 (5.4)     |         |
| <b>Preoperative radiotherapy or chemoradiotherapy in rectal cancer patients</b> |                |         |                |         |
| No (n=40; n=51)                                                                 | 90.4 (5.0)     | 0.235   | 89.5 (5.2)     | 0.626   |
| Yes (n=32; n=37)                                                                | 91.9 (5.7)     |         | 88.9 (5.8)     |         |
| <b>WHO grade</b>                                                                |                |         |                |         |
| Grade 1 (n=21; n=58)                                                            | 91.2 (8.4)     | 0.189   | 86.0 (6.8)     | 0.174   |
| Grade 2 (n=108; n=121)                                                          | 88.1 (6.7)     |         | 87.3 (6.0)     |         |
| Grade 3 (n=18; n=28)                                                            | 88.8 (6.9)     |         | 85.1 (6.6)     |         |
| <b>TNM Stage</b>                                                                |                |         |                |         |
| Stage I (n=27; n=54)                                                            | 92.2 (6.0)     | 0.005   | 88.4 (6.0)     | 0.022   |
| Stage II (n=54; n=59)                                                           | 87.2 (6.6)     |         | 84.8 (7.0)     |         |
| Stage III (n=44; n=71)                                                          | 89.5 (7.8)     |         | 86.8 (5.5)     |         |
| Stage IV (n=22; n=24)                                                           | 86.1 (5.8)     |         | 86.8 (6.7)     |         |
| <b>Primary tumor</b>                                                            |                |         |                |         |
| T1 (n=5; n=11)                                                                  | 90.8 (7.1)     | 0.005   | 92.1 (5.4)     | 0.001   |
| T2 (n=29; n=60)                                                                 | 92.6 (5.9)     |         | 88.1 (5.7)     |         |
| T3 (n=102; n=116)                                                               | 87.6 (7.1)     |         | 85.6 (6.4)     |         |
| T4 (n=11; n=21)                                                                 | 87.2 (5.9)     |         | 85.1 (5.7)     |         |
| <b>Lymph node metastasis</b>                                                    |                |         |                |         |
| N0 (n=85; n=115)                                                                | 88.6 (6.8)     | 0.178   | 86.7 (6.9)     | 0.970   |
| N1 (n=36; n=61)                                                                 | 90.3 (6.8)     |         | 86.5 (5.3)     |         |
| N2 (n=25; n=32)                                                                 | 86.9 (7.8)     |         | 86.6 (6.1)     |         |
| <b>Distant Metastasis</b>                                                       |                |         |                |         |
| M0 (n=126; n=184)                                                               | 89.1 (7.1)     | 0.071   | 86.6 (6.3)     | 0.934   |
| M1 (n=22; n=24)                                                                 | 86.1 (5.8)     |         | 86.8 (6.7)     |         |
| <b>Infiltrative growth pattern</b>                                              |                |         |                |         |
| No (n=104; n=174)                                                               | 88.9 (6.8)     | 0.618   | 86.9 (6.2)     | 0.235   |
| Yes (n=43; n=34)                                                                | 88.2 (7.5)     |         | 85.5 (7.0)     |         |
| <b>Lymphatic invasion</b>                                                       |                |         |                |         |
| No (n=83; n=109)                                                                | 89.0 (6.7)     | 0.504   | 86.9 (6.6)     | 0.550   |
| Yes (n=61; n=99)                                                                | 88.3 (7.4)     |         | 86.4 (6.0)     |         |



**Blood vessel invasion**

|                   |            |       |            |       |
|-------------------|------------|-------|------------|-------|
| No (n=117; n=176) | 88.5 (7.3) | 0.410 | 86.9 (6.4) | 0.215 |
| Yes (n=27; n=32)  | 89.7 (5.5) |       | 85.4 (5.9) |       |

**Mismatch repair (MMR)  
enzyme status**

|                               |            |       |            |       |
|-------------------------------|------------|-------|------------|-------|
| MMR Proficient (n=136; n=179) | 88.7 (7.0) | 0.617 | 87.1 (6.3) | 0.021 |
| MMR Deficient (n=11; n=29)    | 87.6 (7.2) |       | 84.1 (5.6) |       |

**BRAF VE1 immunohistochemistry**

|                         |            |       |            |       |
|-------------------------|------------|-------|------------|-------|
| Negative (n=133; n=189) | 88.9 (6.9) | 0.066 | 86.6 (6.4) | 0.949 |
| Positive (n=14; n=19)   | 85.3 (7.6) |       | 86.7 (5.4) |       |

**Modified Glasgow  
Prognostic Score (mGPS)**

|                  |            |       |            |       |
|------------------|------------|-------|------------|-------|
| 0 (n=118; n=151) | 89.1 (7.4) | 0.292 | 87.3 (6.2) | 0.016 |
| 1 (n=25; n=38)   | 86.9 (5.3) |       | 84.7 (6.4) |       |
| 2 (n=5; n=3)     | 86.4 (3.5) |       | 86.8 (6.3) |       |

---

**Table S5.** Relationships between different categories of anemia, mismatch repair (MMR) enzyme status, and BRAF VE1 immunohistochemistry in proximal colon

| <b>Variable</b>                      | No anemia (n=39) | Microcytic anemia (n=28) | Normocytic anemia (n=56) | P value |
|--------------------------------------|------------------|--------------------------|--------------------------|---------|
| <b>MMR enzyme status</b>             |                  |                          |                          |         |
| MMR Proficient                       | 29 (34.5%)       | 19 (22.6%)               | 36 (42.9%)               | 0.577   |
| MMR Deficient                        | 10 (25.6%)       | 9 (23.1%)                | 20 (51.3%)               |         |
| <b>BRAF VE1 immunohistochemistry</b> |                  |                          |                          |         |
| Negative                             | 30 (31.3%)       | 23 (24.0%)               | 43 (44.8%)               | 0.885   |
| Positive                             | 9 (33.3%)        | 5 (18.5%)                | 13 (48.1%)               |         |

Due to the small number of macrocytic anemia cases (n=2), macrocytic anemia category was not included in the analysis.

**Table S6.** Correlation between blood hemoglobin, erythrocyte mean corpuscular volume (MCV) and systemic inflammatory markers in the combined cohort.

|                                            | Unadjusted |         | Adjusted |         |
|--------------------------------------------|------------|---------|----------|---------|
|                                            | Pearson r  | p value | Beta     | p value |
| <b>Blood hemoglobin</b>                    |            |         |          |         |
| Serum CRP                                  | -0.233     | <0.001  | -0.124   | 0.012   |
| Serum Albumin                              | 0.302      | <0.001  | 0.253    | <0.001  |
| <b>Erythrocyte mean corpuscular volume</b> |            |         |          |         |
| Serum CRP                                  | -0.202     | <0.001  | -0.121   | 0.021   |
| Serum Albumin                              | 0.066      | 0.215   | 0.025    | 0.615   |

Serum CRP was logarithmically transformed because of positive skewness. The correlations were adjusted for tumor location based estimated tumor distance from anus, tumor stage variables (T1-2 vs. T3-4; N0 vs. N1-2; M0 vs. M1), and patient gender. Abbreviations: CRP: C-reactive protein; MCV: mean corpuscular volume.

**Table S7.** Correlation between blood hemoglobin levels and systemic inflammatory markers in Cohort 1.

|                                      | Unadjusted |         | Adjusted |         |
|--------------------------------------|------------|---------|----------|---------|
|                                      | Pearson r  | p value | Beta     | p value |
| <b>Systemic inflammatory markers</b> |            |         |          |         |
| Serum CRP                            | -0.265     | 0.0012  | -0.144   | 0.058   |
| Serum Albumin                        | 0.309      | <0.001  | 0.279    | <0.001  |
| <b>Serum cytokines</b>               |            |         |          |         |
| IL-1RA                               | -0.177     | 0.031   | -0.070   | 0.360   |
| IL-4                                 | 0.005      | 0.947   | 0.078    | 0.291   |
| IL-6                                 | -0.210     | 0.011   | -0.049   | 0.527   |
| IL-7                                 | -0.070     | 0.401   | -0.023   | 0.760   |
| IL-8                                 | -0.346     | <0.001  | -0.227   | 0.009   |
| IL-9                                 | 0.014      | 0.864   | 0.092    | 0.210   |
| IL-12                                | -0.115     | 0.164   | 0.022    | 0.764   |
| IFN- $\gamma$                        | -0.023     | 0.780   | 0.058    | 0.433   |
| CXCL10                               | -0.172     | 0.037   | -0.090   | 0.225   |
| CCL2                                 | 0.062      | 0.456   | 0.101    | 0.176   |
| CCL4                                 | -0.113     | 0.172   | -0.096   | 0.187   |
| CCL11                                | 0.055      | 0.508   | 0.001    | 0.985   |
| PDGF-BB                              | -0.029     | 0.723   | 0.003    | 0.972   |

Serum CRP and serum cytokines were logarithmically transformed because of positive skewness. The adjusted correlations were calculated with multiple linear regression. The correlations were adjusted for tumor location based estimated tumor distance from anus, tumor stage variables (T1-2 vs. T3-4; N0 vs. N1-2; M0 vs. M1), and patient gender. Abbreviations: CCL: Chemokine (C-C motif) ligand; CRP: C-reactive protein; CXCL: Chemokine (C-X-C motif) ligand; IFN: interferon IL: interleukin; MCV: mean corpuscular volume; PDGF: Platelet-derived growth factor.

**Table S8.** Correlation between different classes of anemia and systemic inflammatory markers.

|                        | No anemia             | Microcytic anemia       | Normocytic anemia       | P value | P value<br>(microcytic<br>anemia vs<br>normocytic<br>anemia or<br>no anemia) | P value<br>(normocytic<br>anemia vs<br>microcytic<br>anemia or<br>no anemia) |
|------------------------|-----------------------|-------------------------|-------------------------|---------|------------------------------------------------------------------------------|------------------------------------------------------------------------------|
| <b>Combined cohort</b> |                       |                         |                         |         |                                                                              |                                                                              |
| CRP (mg/L)             | 2.0 (0.8-5.7)         | 5.0 (1.0-9.8)           | 5.3 (0.9-13.7)          | 0.002   | 0.269                                                                        | 0.003                                                                        |
| Albumin (g/L)          | 43 (41-45)            | 43 (40-44)              | 41 (38.5-44)            | <0.001  | 0.603                                                                        | <0.001                                                                       |
| <b>Cohort 1</b>        |                       |                         |                         |         |                                                                              |                                                                              |
| CRP (mg/L)             | 1.8 (0.8-4.7)         | 1.8 (0.6-8.2)           | 6.9 (0.9-18.1)          | 0.053   | 0.792                                                                        | 0.015                                                                        |
| Albumin (g/L)          | 43 (41-46)            | 43 (39.8-44)            | 41.5 (37-45)            | 0.008   | 0.326                                                                        | 0.007                                                                        |
| IL-1RA (pg/mL)         | 60.2 (37.9-89.1)      | 67.2 (38.6-132.8)       | 63.4 (38-99.2)          | 0.253   | 0.132                                                                        | 0.616                                                                        |
| IL-4 (pg/mL)           | 0.8 (0.7-1)           | 0.9 (0.6-1.2)           | 0.9 (0.7-1.1)           | 0.571   | 0.694                                                                        | 0.356                                                                        |
| IL-6 (pg/mL)           | 4.4 (3.2-6.9)         | 7.2 (3.4-10.3)          | 6.5 (4.1-11.9)          | 0.017   | 0.281                                                                        | 0.015                                                                        |
| IL-7 (pg/mL)           | 5.6 (4.2-7.5)         | 5.5 (4.4-11.6)          | 5.9 (3.8-8)             | 0.857   | 0.565                                                                        | 0.996                                                                        |
| IL-8 (pg/mL)           | 10.7 (8.6-13.6)       | 13.8 (11.2-25.5)        | 15.2 (10-25.1)          | <0.001  | 0.100                                                                        | 0.001                                                                        |
| IL-9 (pg/mL)           | 8.7 (6-13.4)          | 9.6 (6.2-13.4)          | 8.1 (4.7-16.6)          | 0.968   | 0.859                                                                        | 0.870                                                                        |
| IL-12 (pg/mL)          | 27.2 (13.2-37.7)      | 32.5 (17.9-43)          | 33.5 (17-46.9)          | 0.406   | 0.643                                                                        | 0.226                                                                        |
| IFN- $\gamma$ (pg/mL)  | 28.9 (23.6-40.1)      | 31 (23.4-49.6)          | 33.7 (23.1-46.4)        | 0.470   | 0.492                                                                        | 0.357                                                                        |
| CXCL10 (pg/mL)         | 894.6 (659.6-1215.2)  | 967.6 (751.8-1176.8)    | 986.1 (757-1452.2)      | 0.373   | 0.982                                                                        | 0.150                                                                        |
| CCL2 (pg/mL)           | 17.2 (12.2-23.7)      | 15.9 (10.8-24.9)        | 18.7 (11.4-28.4)        | 0.681   | 0.415                                                                        | 0.667                                                                        |
| CCL4 (pg/mL)           | 62.3 (51-83.1)        | 61 (50.2-88.1)          | 68.1 (47.8-86)          | 0.718   | 0.945                                                                        | 0.410                                                                        |
| CCL11 (pg/mL)          | 131.2 (91.7-174.3)    | 139.3 (89-193.4)        | 131.1 (95.9-185.6)      | 0.983   | 0.915                                                                        | 0.825                                                                        |
| PDGF-BB (pg/mL)        | 8480 (6021.6-11360.5) | 8263.3 (5806.8-15191.2) | 8109.6 (4842.8-11261.9) | 0.753   | 0.579                                                                        | 0.549                                                                        |
| <b>Cohort 2</b>        |                       |                         |                         |         |                                                                              |                                                                              |
| CRP (mg/L)             | 2.7 (0.7-6.1)         | 5.1 (1.6-17.0)          | 4.6 (0.9-12.4)          | 0.026   | 0.108                                                                        | 0.090                                                                        |
| Albumin (g/L)          | 43.0 (41.0-45.0)      | 43.0 (41.0-45.0)        | 41.5 (39.0-44.0)        | <0.001  | 0.852                                                                        | <0.001                                                                       |

Abbreviations: CCL: Chemokine (C-C motif) ligand; CRP: C-reactive protein; CXCL: Chemokine (C-X-C motif) ligand; IFN: interferon IL: interleukin; MCV: mean corpuscular volume; PDGF: Platelet-derived growth factor.
